# Supplementary material for: ZAR1 is a novel epigenetically inactivated tumour suppressor in lung cancer
Source: Clin Epigenetics. 2017 Jun 2;9:60. doi: 10.1186/s13148-017-0360-4 (PMC5457737; doi:10.1186/s13148-017-0360-4)
Supplement: Supplementary file 3 — Supplemental Table 2. (XLSX 13 kb) [file 13148_2017_360_MOESM3_ESM.xlsx]

## Sheet: Tabelle1
Supplementary Table 2
Summary of ZAR1 methylation
	entity	n	methylation	Fisher exact test
cell lines	SCLC	15/20	0.75
	NSCLC	5/6	0.83
primary tissue	SCLC	5/23	0.22
	NSCLC	16/21	0.76
	Control	1/9	0.11
